# Supplementary material for: Extraction and Purification of Flavonoids and Antiviral and Antioxidant Activities of Polygonum perfoliatum L
Source: MDPI journal article supplement (doi:10.3390/molecules30010029), 2024-12-25
Supplement: s1 [file s1]

**Table S1:** HPLC-MS/MS Analysis of 80 Flavonoid Components in Purified Flavonoids of *Polygonum perfoliatum* L

| Molecular Weight (Da) | Formula                                         | Ionization model                         | Compounds                        |
|-----------------------|-------------------------------------------------|------------------------------------------|----------------------------------|
| 302.04271             | C <sub>15</sub> H <sub>10</sub> O <sub>7</sub>  | [M+H] <sup>+</sup><br>[M-H] <sup>-</sup> | Quercetin                        |
| 476.0959              | C <sub>22</sub> H <sub>20</sub> O <sub>12</sub> | [M+H] <sup>+</sup>                       | Scutellarin methyl ester         |
| 344.09016             | C <sub>18</sub> H <sub>16</sub> O <sub>7</sub>  | [M+H] <sup>+</sup><br>[M-H] <sup>-</sup> | Lysionotin                       |
| 610.15491             | C <sub>27</sub> H <sub>30</sub> O <sub>16</sub> | [M+H] <sup>+</sup><br>[M-H] <sup>-</sup> | Rutin                            |
| 578.16426             | C <sub>27</sub> H <sub>30</sub> O <sub>14</sub> | [M+H] <sup>+</sup><br>[M-H] <sup>-</sup> | Rhoifolin                        |
| 594.15981             | C <sub>27</sub> H <sub>30</sub> O <sub>15</sub> | [M+H] <sup>+</sup><br>[M-H] <sup>-</sup> | Kaempferol-3-O-rutinoside        |
| 578.14318             | C <sub>30</sub> H <sub>26</sub> O <sub>12</sub> | [M+H] <sup>+</sup><br>[M-H] <sup>-</sup> | Procyanidin B1                   |
| 594.13799             | C <sub>30</sub> H <sub>26</sub> O <sub>13</sub> | [M+H] <sup>+</sup>                       | Tiliroside                       |
| 446.08528             | C <sub>21</sub> H <sub>18</sub> O <sub>11</sub> | [M+H] <sup>+</sup>                       | Baicalin                         |
| 344.08986             | C <sub>18</sub> H <sub>16</sub> O <sub>7</sub>  | [M+H] <sup>+</sup><br>[M-H] <sup>-</sup> | Eupatilin                        |
| 290.07923             | C <sub>15</sub> H <sub>14</sub> O <sub>6</sub>  | [M+H] <sup>+</sup><br>[M-H] <sup>-</sup> | (+)-Catechin hydrate             |
| 478.07521             | C <sub>21</sub> H <sub>18</sub> O <sub>13</sub> | [M+H] <sup>+</sup><br>[M-H] <sup>-</sup> | Quercetin<br>3-O-β-D-Glucuronide |
| 594.15927             | C <sub>27</sub> H <sub>30</sub> O <sub>15</sub> | [M+H] <sup>+</sup><br>[M-H] <sup>-</sup> | Vicenin II                       |
| 594.15968             | C <sub>27</sub> H <sub>30</sub> O <sub>15</sub> | [M+H] <sup>+</sup><br>[M-H] <sup>-</sup> | Lonicerin                        |
| 320.05322             | C <sub>15</sub> H <sub>12</sub> O <sub>8</sub>  | [M+H] <sup>+</sup><br>[M-H] <sup>-</sup> | Dihydromyricetin                 |
| 462.08013             | C <sub>21</sub> H <sub>18</sub> O <sub>12</sub> | [M+H] <sup>+</sup>                       | Scutellarin                      |
| 448.10109             | C <sub>21</sub> H <sub>20</sub> O <sub>11</sub> | [M+H] <sup>+</sup>                       | Orientin                         |
| 300.09991             | C <sub>17</sub> H <sub>16</sub> O <sub>5</sub>  | [M+H] <sup>+</sup><br>[M-H] <sup>-</sup> | 4',7-Di-O-methylnaringenin       |

|           |                                                 |                                          |                                 |
|-----------|-------------------------------------------------|------------------------------------------|---------------------------------|
| 476.09606 | C <sub>22</sub> H <sub>20</sub> O <sub>12</sub> | [M+H] <sup>+</sup>                       | 6-O-Methylscutellarin           |
| 432.1061  | C <sub>21</sub> H <sub>20</sub> O <sub>10</sub> | [M+H] <sup>+</sup><br>[M-H] <sup>-</sup> | Vitexin                         |
| 594.15942 | C <sub>27</sub> H <sub>30</sub> O <sub>15</sub> | [M+H] <sup>+</sup>                       | Kaempferol<br>3-glucorhamnoside |
| 448.10126 | C <sub>21</sub> H <sub>20</sub> O <sub>11</sub> | [M+H] <sup>+</sup><br>[M-H] <sup>-</sup> | Homoorientin                    |
| 402.1316  | C <sub>21</sub> H <sub>22</sub> O <sub>8</sub>  | [M+H] <sup>+</sup>                       | Nobiletin                       |
| 448.10091 | C <sub>21</sub> H <sub>20</sub> O <sub>11</sub> | [M+H] <sup>+</sup><br>[M-H] <sup>-</sup> | Astragalin                      |
| 302.04281 | C <sub>15</sub> H <sub>10</sub> O <sub>7</sub>  | [M+H] <sup>+</sup><br>[M-H] <sup>-</sup> | Morin                           |
| 304.0584  | C <sub>15</sub> H <sub>12</sub> O <sub>7</sub>  | [M+H] <sup>+</sup><br>[M-H] <sup>-</sup> | Taxifolin                       |
| 316.05834 | C <sub>16</sub> H <sub>12</sub> O <sub>7</sub>  | [M+H] <sup>+</sup><br>[M-H] <sup>-</sup> | Isorhamnetin                    |
| 592.18118 | C <sub>28</sub> H <sub>32</sub> O <sub>14</sub> | [M+H] <sup>+</sup>                       | Linarin                         |
| 272.06851 | C <sub>15</sub> H <sub>12</sub> O <sub>5</sub>  | [M+H] <sup>+</sup><br>[M-H] <sup>-</sup> | Naringenin                      |
| 286.08443 | C <sub>16</sub> H <sub>14</sub> O <sub>5</sub>  | [M+H] <sup>+</sup><br>[M-H] <sup>-</sup> | Isosakuranetin                  |
| 464.09548 | C <sub>21</sub> H <sub>20</sub> O <sub>12</sub> | [M+H] <sup>+</sup>                       | Hyperoside                      |
| 464.09548 | C <sub>21</sub> H <sub>20</sub> O <sub>12</sub> | [M-H] <sup>-</sup>                       | Isoquercitrin                   |
| 432.10604 | C <sub>21</sub> H <sub>20</sub> O <sub>10</sub> | [M+H] <sup>+</sup>                       | Afzelin                         |
| 290.07915 | C <sub>15</sub> H <sub>14</sub> O <sub>6</sub>  | [M+H] <sup>+</sup><br>[M-H] <sup>-</sup> | Epicatechin                     |
| 286.0478  | C <sub>15</sub> H <sub>10</sub> O <sub>6</sub>  | [M+H] <sup>+</sup>                       | Luteolin                        |
| 316.05843 | C <sub>16</sub> H <sub>12</sub> O <sub>7</sub>  | [M+H] <sup>+</sup><br>[M-H] <sup>-</sup> | Eupafolin                       |
| 564.14855 | C <sub>26</sub> H <sub>28</sub> O <sub>14</sub> | [M+H] <sup>+</sup>                       | Isoschaftoside                  |
| 314.07915 | C <sub>17</sub> H <sub>14</sub> O <sub>6</sub>  | [M+H] <sup>+</sup><br>[M-H] <sup>-</sup> | Pectolinarigenin                |
| 286.04786 | C <sub>15</sub> H <sub>10</sub> O <sub>6</sub>  | [M+H] <sup>+</sup><br>[M-H] <sup>-</sup> | Kaempferol                      |
| 608.1755  | C <sub>28</sub> H <sub>32</sub> O <sub>15</sub> | [M+H] <sup>+</sup>                       | Diosmin                         |

|           |                                                 |                                          |                                                                                                                                  |
|-----------|-------------------------------------------------|------------------------------------------|----------------------------------------------------------------------------------------------------------------------------------|
| 302.07947 | C <sub>16</sub> H <sub>14</sub> O <sub>6</sub>  | [M+H] <sup>+</sup><br>[M-H] <sup>-</sup> | Hesperetin                                                                                                                       |
| 318.03759 | C <sub>15</sub> H <sub>10</sub> O <sub>8</sub>  | [M+H] <sup>+</sup><br>[M-H] <sup>-</sup> | Myricetin                                                                                                                        |
| 506.10665 | C <sub>23</sub> H <sub>22</sub> O <sub>13</sub> | [M+H] <sup>+</sup>                       | 6"-O-Acetylisouquercitrin                                                                                                        |
| 288.06346 | C <sub>15</sub> H <sub>12</sub> O <sub>6</sub>  | [M+H] <sup>+</sup><br>[M-H] <sup>-</sup> | Eriodictyol                                                                                                                      |
| 434.08531 | C <sub>20</sub> H <sub>18</sub> O <sub>11</sub> | [M+H] <sup>+</sup>                       | Avicularin                                                                                                                       |
| 434.1217  | C <sub>21</sub> H <sub>22</sub> O <sub>10</sub> | [M+H] <sup>+</sup><br>[M-H] <sup>-</sup> | Engeletin                                                                                                                        |
| 374.10122 | C <sub>19</sub> H <sub>18</sub> O <sub>8</sub>  | [M+H] <sup>+</sup><br>[M-H] <sup>-</sup> | Chrysosplenetin B                                                                                                                |
| 298.08442 | C <sub>17</sub> H <sub>14</sub> O <sub>5</sub>  | [M+H] <sup>+</sup>                       | 5-Hydroxy-6,7-dimethoxy<br>flavone                                                                                               |
| 318.07417 | C <sub>16</sub> H <sub>14</sub> O <sub>7</sub>  | [M+H] <sup>+</sup>                       | Padmatin                                                                                                                         |
| 482.12195 | C <sub>25</sub> H <sub>22</sub> O <sub>10</sub> | [M+H] <sup>+</sup><br>[M-H] <sup>-</sup> | Silibinin                                                                                                                        |
| 610.15338 | C <sub>27</sub> H <sub>30</sub> O <sub>16</sub> | [M+H] <sup>+</sup><br>[M-H] <sup>-</sup> | 2"-O-β-L-Galactopyranosy<br>lorientin                                                                                            |
| 520.08531 | C <sub>23</sub> H <sub>20</sub> O <sub>14</sub> | [M+H] <sup>+</sup><br>[M-H] <sup>-</sup> | 2-Hydroxy-4-(9-hydroxy-<br>7-methoxy-8-oxo-8H-[1,3]<br>dioxolo[4,5-g]chromen-6-<br>yl)phenyl<br>β-D-glucopyranosiduronic<br>acid |
| 270.08921 | C <sub>16</sub> H <sub>14</sub> O <sub>4</sub>  | [M+H] <sup>+</sup>                       | Medicarpin                                                                                                                       |
| 416.11073 | C <sub>21</sub> H <sub>20</sub> O <sub>9</sub>  | [M+H] <sup>+</sup><br>[M-H] <sup>-</sup> | Puerarin                                                                                                                         |
| 284.06847 | C <sub>16</sub> H <sub>12</sub> O <sub>5</sub>  | [M+H] <sup>+</sup><br>[M-H] <sup>-</sup> | Glycitein                                                                                                                        |
| 270.05282 | C <sub>15</sub> H <sub>10</sub> O <sub>5</sub>  | [M+H] <sup>+</sup><br>[M-H] <sup>-</sup> | Genistein                                                                                                                        |
| 268.03717 | C <sub>15</sub> H <sub>8</sub> O <sub>5</sub>   | [M+H] <sup>+</sup>                       | Coumestrol                                                                                                                       |
| 430.12638 | C <sub>22</sub> H <sub>22</sub> O <sub>9</sub>  | [M+H] <sup>+</sup>                       | Ononin                                                                                                                           |
| 330.07395 | C <sub>17</sub> H <sub>14</sub> O <sub>7</sub>  | [M+H] <sup>+</sup>                       | Iristectorigenin B                                                                                                               |

|           |                                                               |                    |                                                                                    |
|-----------|---------------------------------------------------------------|--------------------|------------------------------------------------------------------------------------|
| 600.1645  | C <sub>34</sub> H <sub>24</sub> N <sub>4</sub> O <sub>7</sub> | [M+H] <sup>+</sup> | 6-[Bis(5-nitro-1H-indol-3-yl)methyl]-3-(4-methoxyphenyl)-8-methyl-2H-chromen-2-one |
| 358.10525 | C <sub>19</sub> H <sub>18</sub> O <sub>7</sub>                | [M-H] <sup>-</sup> | Retusin (flavonol)                                                                 |
| 286.08412 | C <sub>16</sub> H <sub>14</sub> O <sub>5</sub>                | [M-H] <sup>-</sup> | 5,7-Dihydroxy-4-(4-methoxyphenyl)-2-chromanone                                     |
| 450.11621 | C <sub>21</sub> H <sub>22</sub> O <sub>11</sub>               | [M-H] <sup>-</sup> | 3,5-Dihydroxy-2-(4-hydroxyphenyl)-4-oxo-3,4-dihydro-2H-chromen-7-yl hexopyranoside |
| 360.08452 | C <sub>18</sub> H <sub>16</sub> O <sub>8</sub>                | [M-H] <sup>-</sup> | 5,7,3'-Trihydroxy-6,4',5'-trimethoxyflavone                                        |
| 442.09    | C <sub>22</sub> H <sub>18</sub> O <sub>10</sub>               | [M-H] <sup>-</sup> | (-)-Epicatechin gallate                                                            |
| 290.07904 | C <sub>15</sub> H <sub>14</sub> O <sub>6</sub>                | [M-H] <sup>-</sup> | Cianidanol                                                                         |
| 436.13695 | C <sub>21</sub> H <sub>24</sub> O <sub>10</sub>               | [M-H] <sup>-</sup> | Phloridzin                                                                         |
| 270.05282 | C <sub>15</sub> H <sub>10</sub> O <sub>5</sub>                | [M-H] <sup>-</sup> | Apigenin                                                                           |
| 446.08491 | C <sub>21</sub> H <sub>18</sub> O <sub>11</sub>               | [M-H] <sup>-</sup> | Apigenin 7-O-glucuronide                                                           |
| 300.027   | C <sub>15</sub> H <sub>8</sub> O <sub>7</sub>                 | [M-H] <sup>-</sup> | Demethylwedelolactone                                                              |
| 448.10056 | C <sub>21</sub> H <sub>20</sub> O <sub>11</sub>               | [M-H] <sup>-</sup> | Kaempferol-7-O-β-D-glucopyranoside                                                 |
| 462.11621 | C <sub>22</sub> H <sub>22</sub> O <sub>11</sub>               | [M-H] <sup>-</sup> | Tectoridin                                                                         |
| 256.07356 | C <sub>15</sub> H <sub>12</sub> O <sub>4</sub>                | [M-H] <sup>-</sup> | Pinocembrin                                                                        |
| 564.14791 | C <sub>26</sub> H <sub>28</sub> O <sub>14</sub>               | [M-H] <sup>-</sup> | Vicenin III                                                                        |
| 300.06339 | C <sub>16</sub> H <sub>12</sub> O <sub>6</sub>                | [M-H] <sup>-</sup> | Diosmetin                                                                          |
| 284.06847 | C <sub>16</sub> H <sub>12</sub> O <sub>5</sub>                | [M-H] <sup>-</sup> | Genkwanin                                                                          |
| 448.13695 | C <sub>22</sub> H <sub>24</sub> O <sub>10</sub>               | [M-H] <sup>-</sup> | Isosakuranin                                                                       |
| 434.1213  | C <sub>21</sub> H <sub>22</sub> O <sub>10</sub>               | [M-H] <sup>-</sup> | Prunin                                                                             |

|           |                                           |                         |                |
|-----------|-------------------------------------------|-------------------------|----------------|
| 578.14243 | $\text{C}_{30}\text{H}_{26}\text{O}_{12}$ | $[\text{M}-\text{H}]^-$ | Procyanidin B2 |
| 330.07395 | $\text{C}_{17}\text{H}_{14}\text{O}_7$    | $[\text{M}-\text{H}]^-$ | Jaceosidin     |

---
